# Supplementary material for: Cyclic ketal bridged bisepoxides: enabling the design of degradable epoxy-amine thermosets for carbon fiber composite applications
Source: Royal Society of Chemistry journal article supplement (doi:10.1039/d3lp00095h), 2023-01-01
Supplement: d3lp00095h1.pdf [file d3lp00095h1.pdf]

## Supplementary Information

### Cyclic ketal bridged bisepoxides: Enabling the design of degradable epoxy-amine thermosets for carbon fiber composite applications

Benjamin M. Alameda, Margaret S. Kumler, J. Scott Murphy, Jeffrey S. Aguinaga, Derek L. Patton\*<sup>a</sup>  
School of Polymer Science and Engineering, University of Southern Mississippi, Hattiesburg, MS 39406, USA. E-mail: derek.patton@usm.edu.

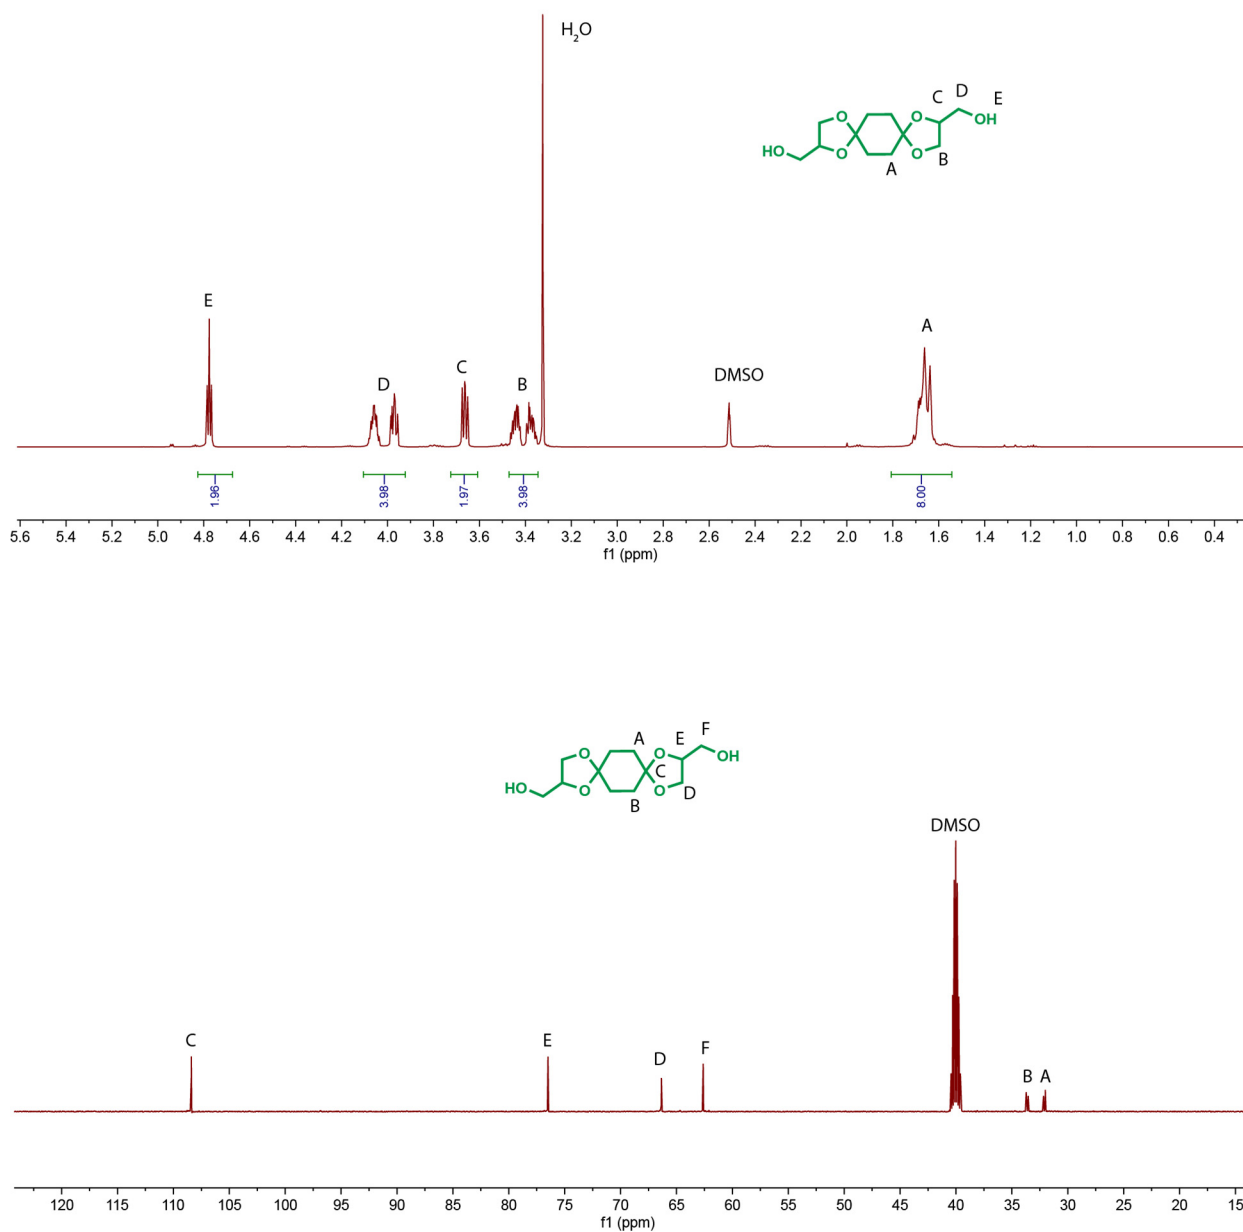

Fig. S1. <sup>1</sup>H-NMR and <sup>13</sup>C-NMR spectra of 2.

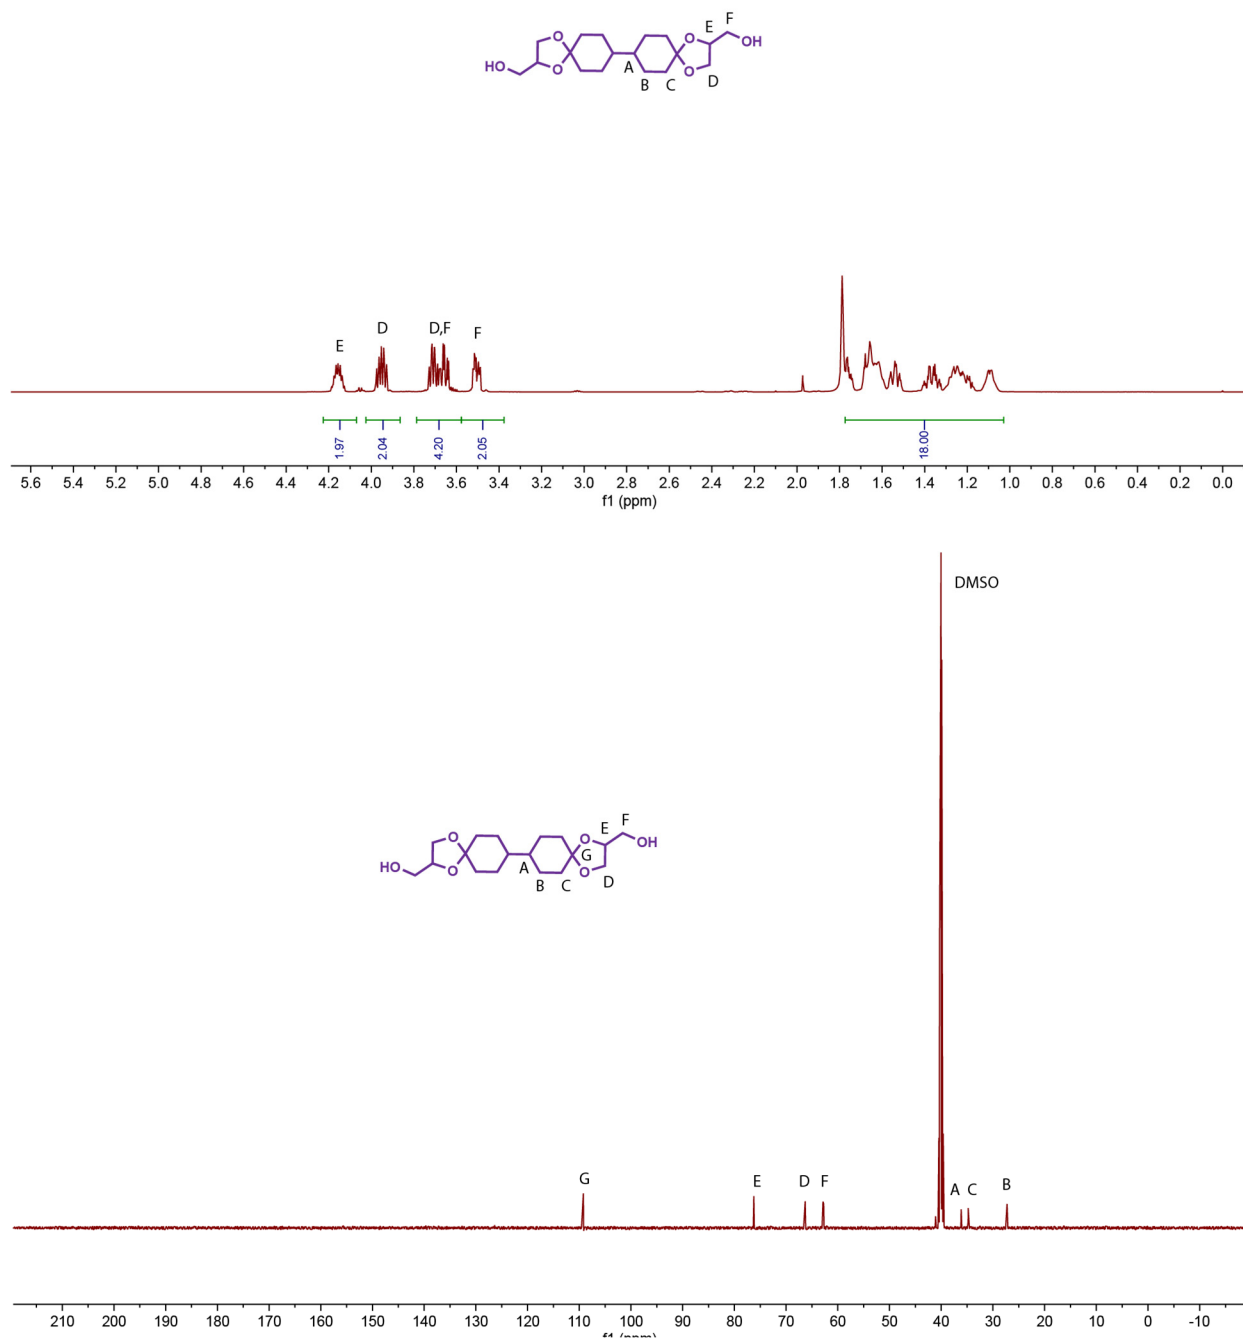

Fig. S2.  $^1\text{H}$ -NMR and  $^{13}\text{C}$ -NMR spectra of 5.

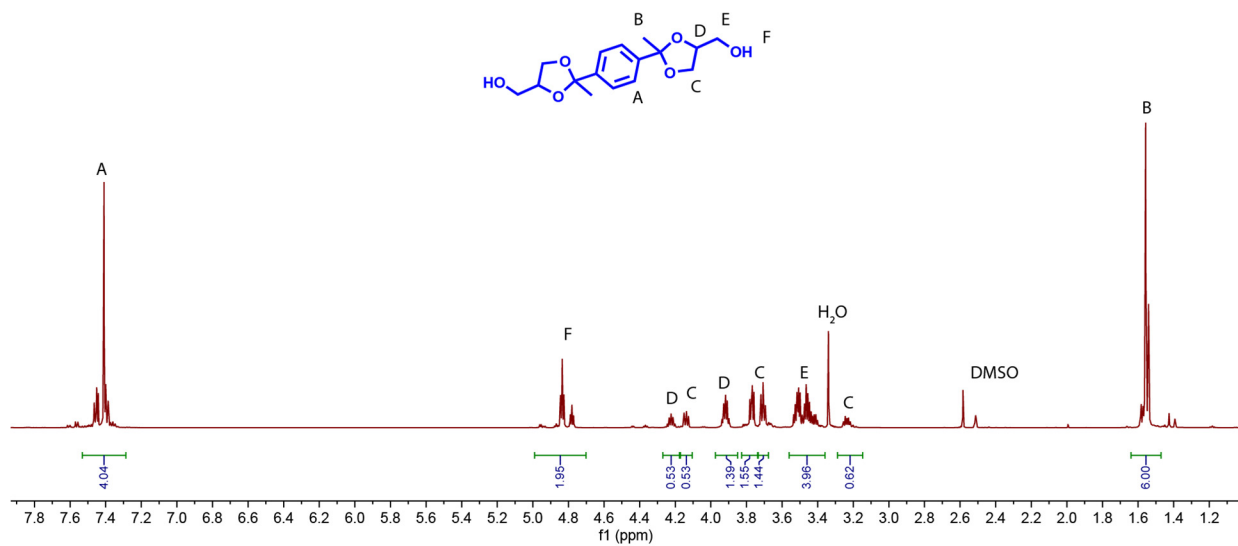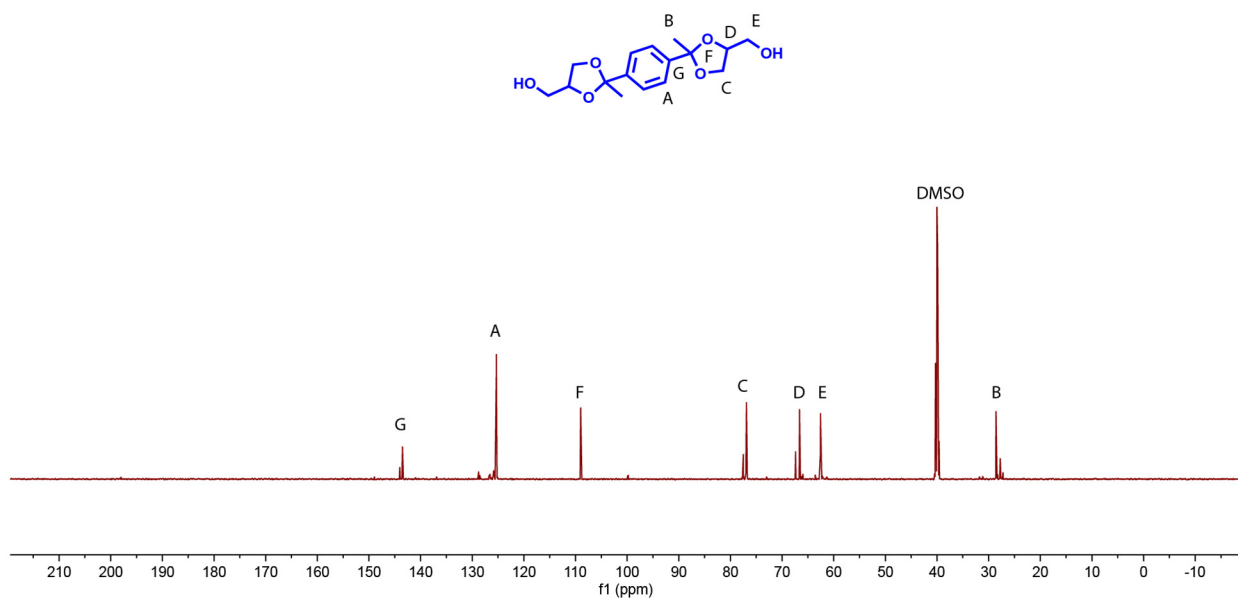

**Fig. S3.**  $^1\text{H-NMR}$  and  $^{13}\text{C-NMR}$  spectra of **8**.

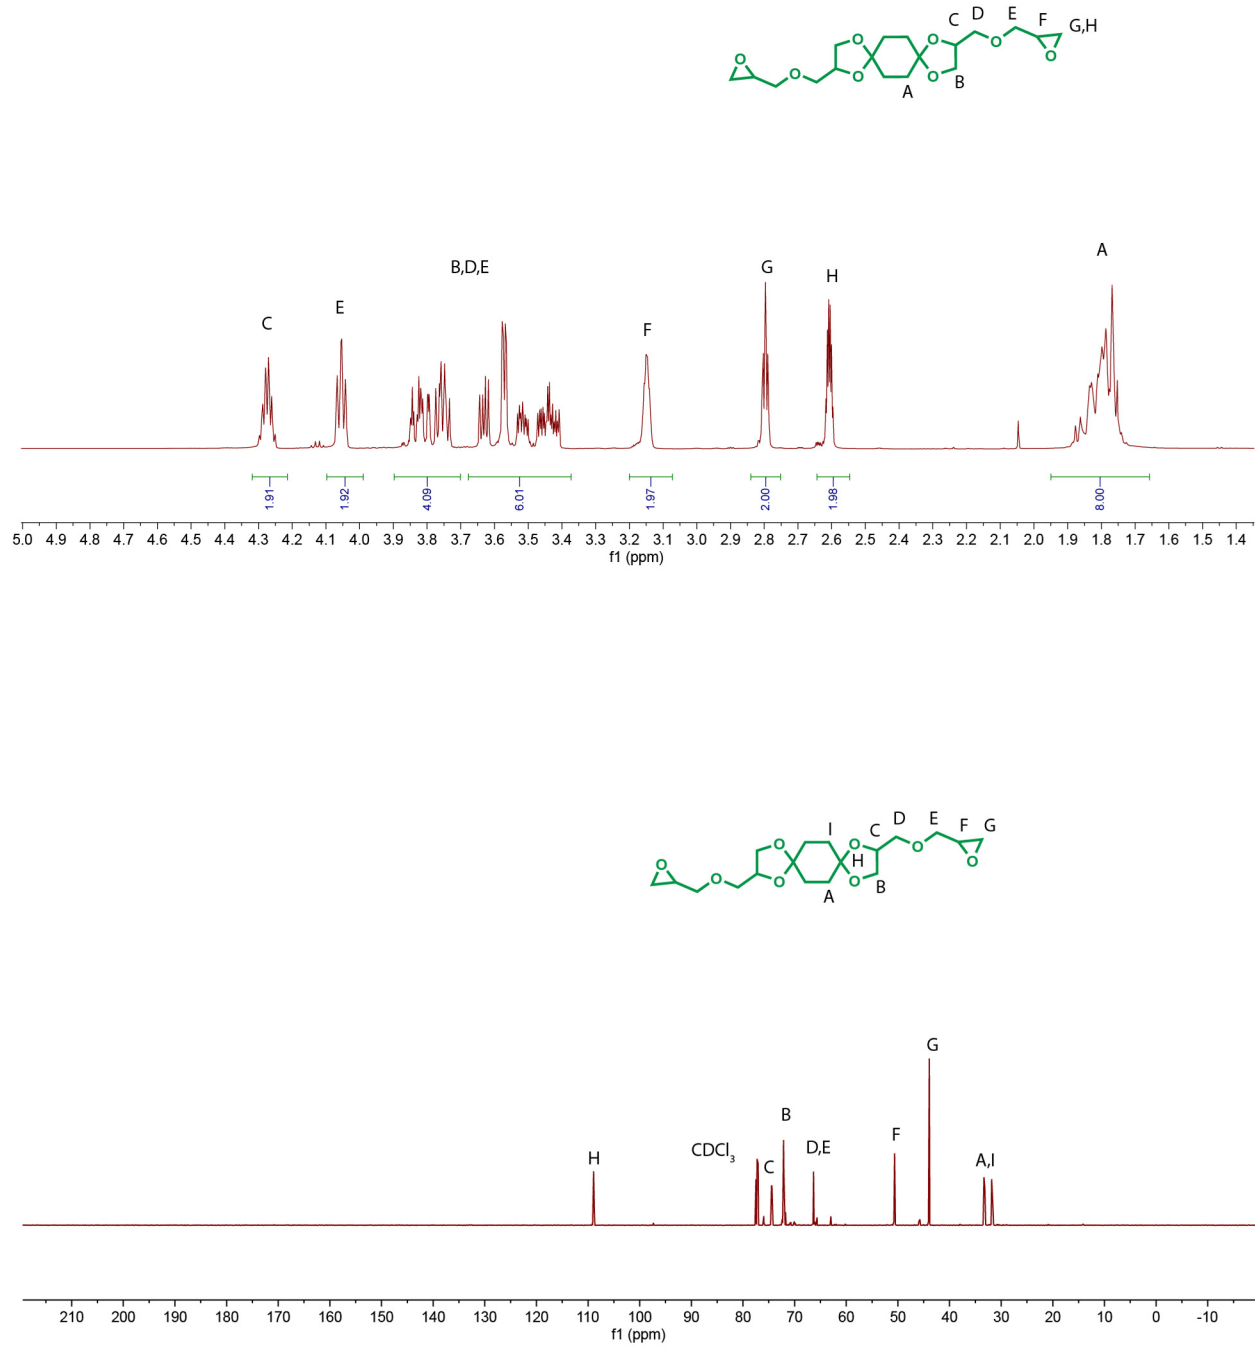

**Fig. S4.**  $^1\text{H}$ -NMR and  $^{13}\text{C}$ -NMR spectra of monomer **3**.

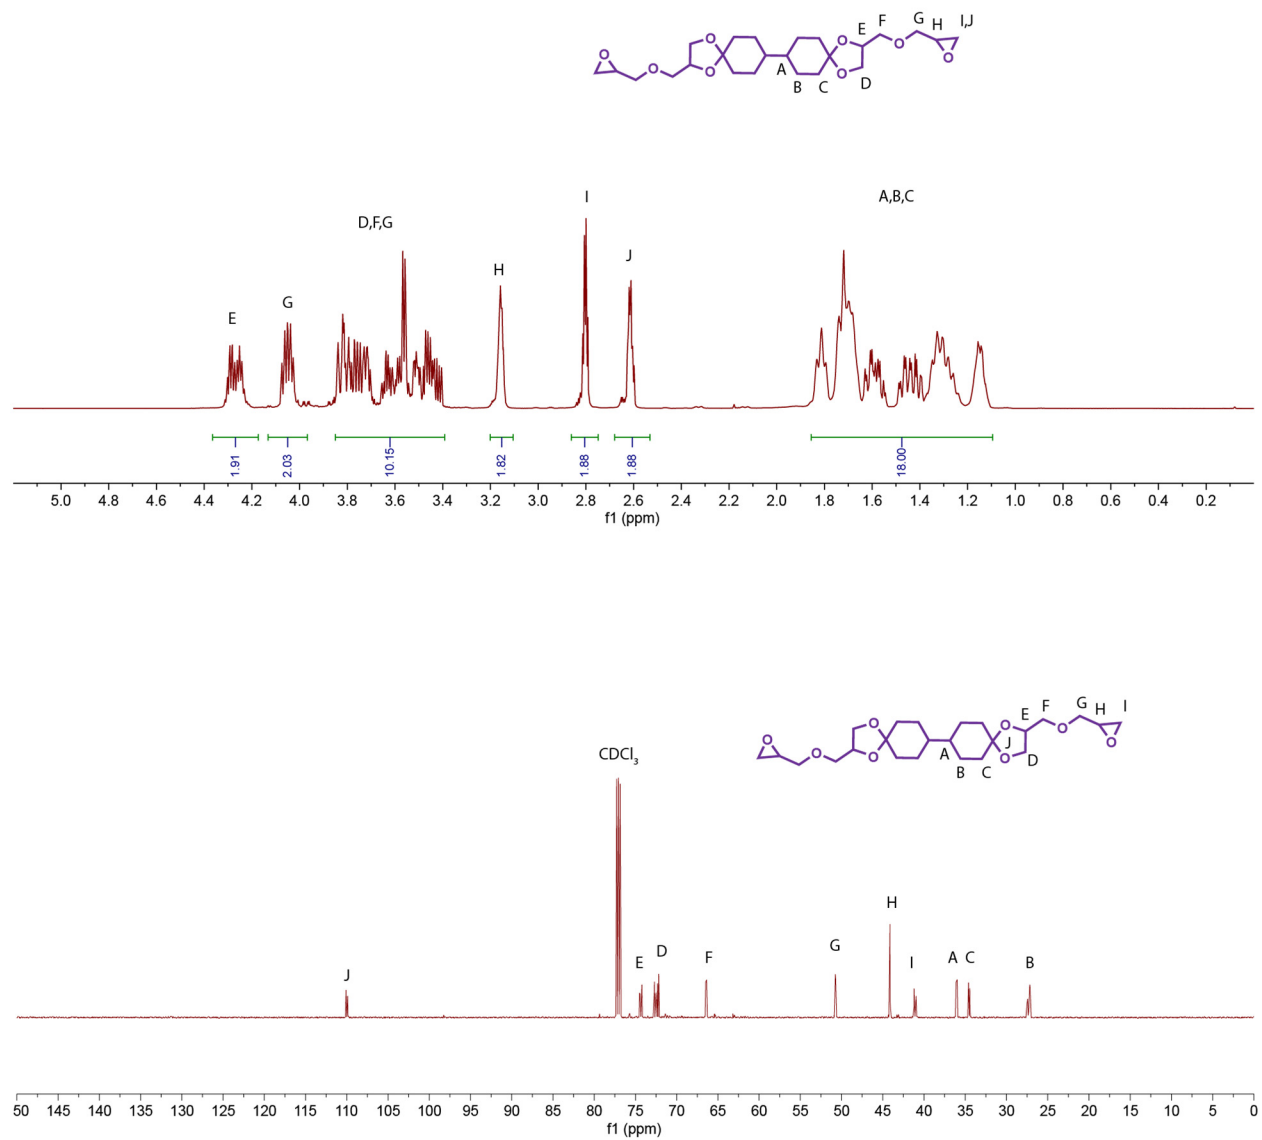

**Fig. S5.**  $^1\text{H-NMR}$  and  $^{13}\text{C-NMR}$  spectra of monomer 6.

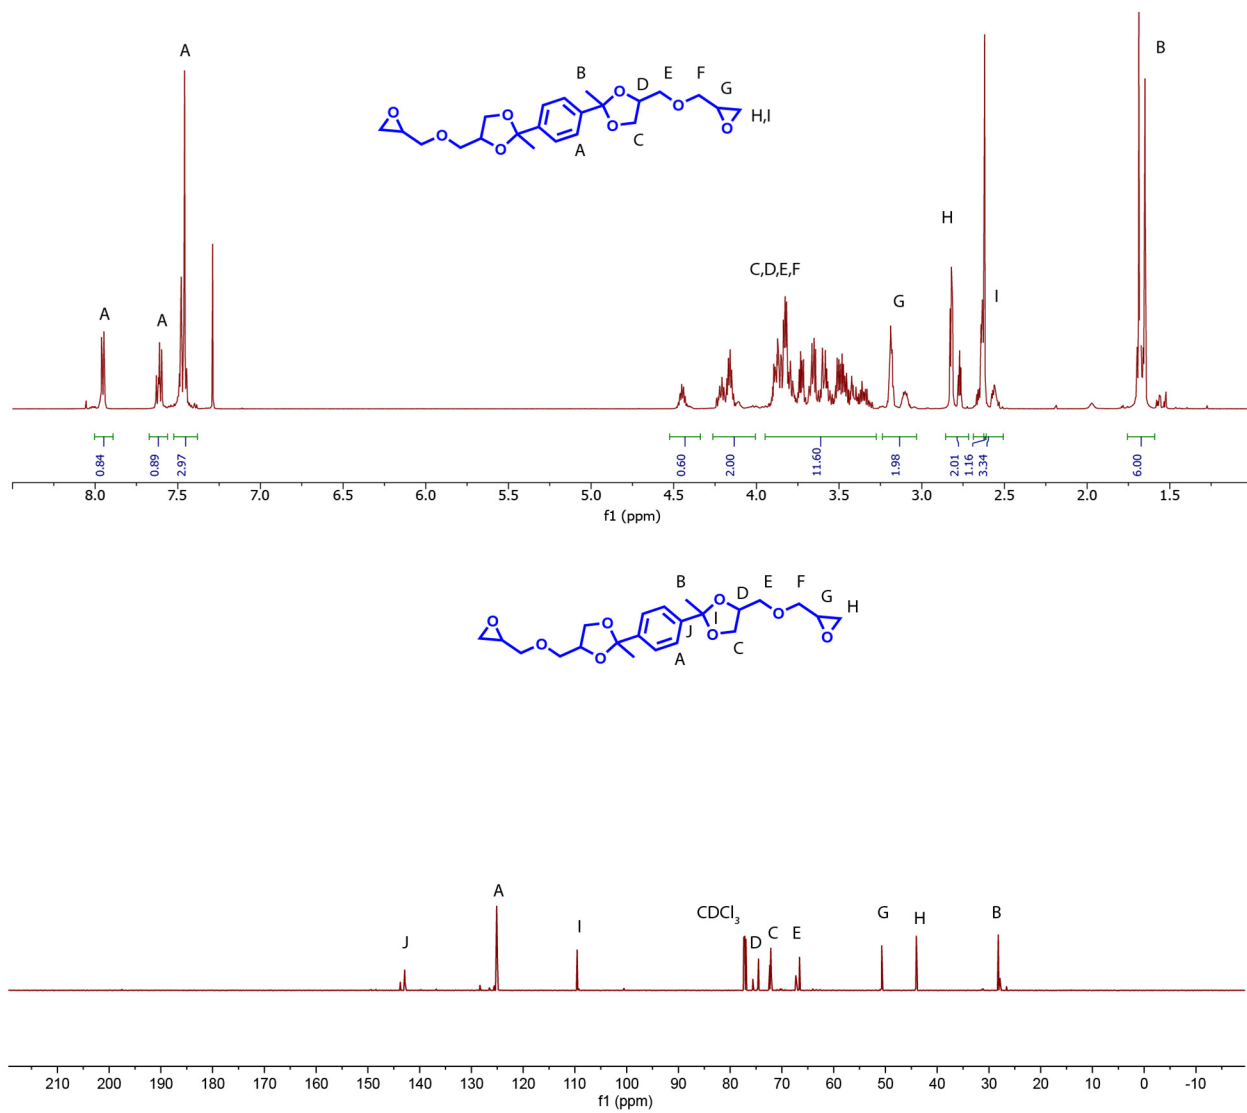

Fig. S6.  $^1\text{H}$ -NMR and  $^{13}\text{C}$ -NMR spectra of monomer 9.

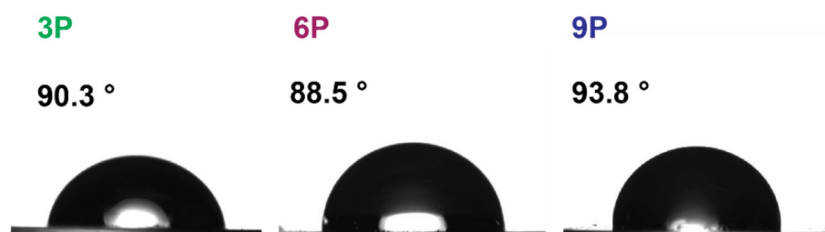

Fig. S7. Water contact angle of thermosets 3P, 6P, and 9P.
